# Supplementary material for: Singlet fission in naturally-organized carotenoid molecules
Source: Royal Society of Chemistry journal article supplement (doi:10.1039/d0cp04493h), 2021-01-01
Supplement: d0cp04493h1.pdf [file d0cp04493h1.pdf]

## Supporting Information

# **Singlet Fission in Naturally-Organised Carotenoid Molecules**

**Annamaria Quaranta<sup>a</sup>, Anja Krieger-Liszkay<sup>a</sup>, Andrew A. Pascal<sup>a</sup>, François Perreau<sup>b</sup>, Bruno Robert<sup>a</sup>, Mikas Vengris<sup>c\*</sup> and Manuel J. Llansola-Portoles<sup>a\*</sup>**

<sup>a</sup> Université Paris-Saclay, CEA, CNRS, Institute for Integrative Biology of the Cell (I2BC), 91198, Gif-sur-Yvette, France

<sup>b</sup> Institut Jean-Pierre Bourgin, INRAE, AgroParisTech, Université Paris-Saclay, 78000, Versailles, France

<sup>c</sup> Laser Research Center, Faculty of Physics, Vilnius University, Saulėtekio Ave. 10, LT-10223, Vilnius, Lithuania

### Corresponding authors

Mikas Vengris, Laser Research Center, Faculty of Physics, Vilnius University, Saulėtekio Ave. 10, LT-10223, Vilnius, Lithuania. e-mail: mikas.vengris@ff.vu.lt

Manuel J Llansola-Portoles, Université Paris-Saclay, CEA, CNRS, Institute for Integrative Biology of the Cell (I2BC), 91198, Gif-sur-Yvette, France. e-mail: manuel.llansola@i2bc.paris-saclay.fr

## HPLC Measurements

The pigments were separated by HPLC and detected by a spectrophotometric diode-array detector, which monitors absorbance at 450 nm and records absorption spectra for each fraction detected. Pigments were identified by retention time and absorption spectrum, by comparison with standards or libraries. The pigments were then quantified at 450 nm according to their chromatographic peak areas and their response factors given by running standards or from their literature values. The measured composition was very similar to that reported previously for daffodil chromoplasts, dominated by lutein (51.1%) and violaxanthin (37.2%), together with traces of oxidized lutein (6.7%), neoxanthin (0.8%), cis-neoxanthin (1.3%), cis-violaxanthin (1.3%) antheraxanthin (1.0%) and zeaxanthin (0.5%)

|                       | t-neoxanthin | c-neoxanthin | t-violaxanthin | luteoxanthin | c-violaxanthin | antheraxanthin | Lutein  | zeaxanthin |
|-----------------------|--------------|--------------|----------------|--------------|----------------|----------------|---------|------------|
| Peak area (450 nm)    | 48258        | 68291        | 2263643        | 390025       | 76576          | 55226          | 2940450 | 27425      |
| concentration (ng/uL) | 1.7          | 2.7          | 78.1           | 14.2         | 2.8            | 2.1            | 107.2   | 1.0        |
| %                     | 0.8          | 1.3          | 37.2           | 6.8          | 1.3            | 1.0            | 51.1    | 0.5        |

**Table S1:** Quantification of carotenoid concentration in extract of daffodil chromoplasts, as assessed by HPLC-UVDAD at 450 nm

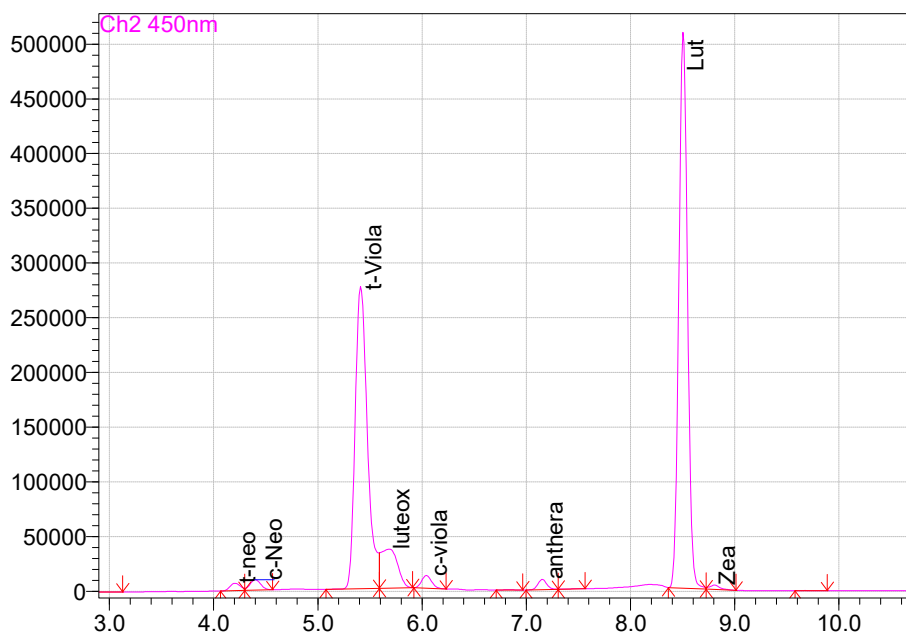

**Figure S1/** HPLC-UVDAD analysis of pigments in daffodil chromoplasts, 450 nm.

**Absorption spectra simulations**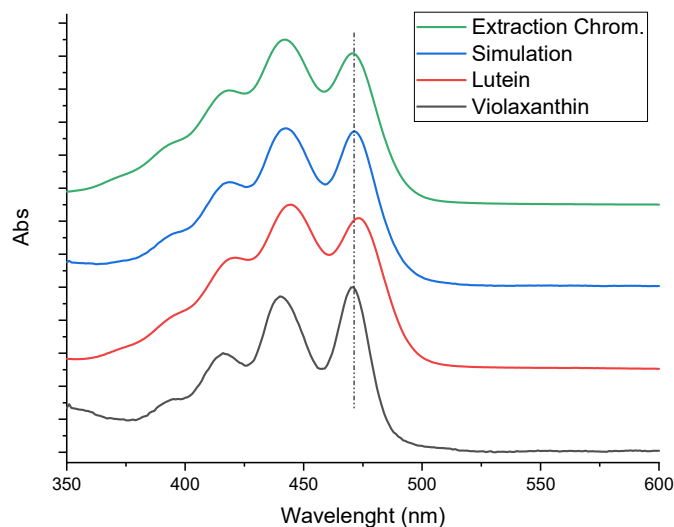

**Figure S2/** Absorption spectra at room temperature of violaxanthin (black), lutein (red), and daffodils chromoplast extract (green) in *n*-hexane. Also shown, in blue, is a simulation of the spectrum for the chromoplast extract, by addition of the Lutein and Violaxanthin spectra in the proportion determined for the extract by HPLC (51.1 & 37.2 %, respectively).
